# Supplementary material for: CD80 and CTLA-4 as diagnostic and prognostic markers in adult-onset minimal change disease: a retrospective study
Source: PeerJ. 2018 Aug 3;6:e5400. doi: 10.7717/peerj.5400 (PMC6078067; doi:10.7717/peerj.5400)
Supplement: Supplemental Information 1 [file peerj-06-5400-s001.xlsx]

## Sheet: Sheet1
Patient	Age(years)	Gender	Urinary CD80 (ng/g creat)	Urinary CTLA-4 (ng/g creat)	Serum CD80 （ng/ml)	Serum CTLA-4 （ng/ml)	24-hour urinary protein (g)	Serum albumin (g/L)
MCD relapse （steroid-sensitive)
1	37	F	758.39	110.95	0.31	0	5.89	18.3
2	14	F	529.01	400.8	1.05	0.81	5.58	22.4
3	19	F	125.24	22.54	0.32	0.09	4	15.3
4	23	M	743	91.72	1.22	0	5.61	27.8
5	17	F	253.72	0	0.3	1.52	9.52	13.6
6	14	F	1556.24	79.62	1.3	0.04	2.75	10.1
7	15	F	313.51	0	0.97	0	4	15
8	14	M	624	378.84	0.99	0.56	3	29.2
9	20	F	389.42	142.47	0.71	0.28	4.37	20.6
10	39	F	477.32	47.85	0.31	0.23	3.17	25.6
11	25	F	899.31	386.28	0.31	0.23	7.33	15.9
12	14	F	968.65	72	0.6	0.16	6.15	16.8
13	44	F	269.38	396.56	0.52	0.15	3	21.5
14	24	M	608.03	339.34	0.4	1.27	4.84	20
15	35	M	2496.47	148.51	1.94	0.04	7.14	22.2
16	15	M	260.42	0	0.36	0	4.02	14.5
17	17	M	882.25	0.67	1.3	0.34	3.82	14.8
18	18	M	5599.18	42.31	1.23	0.24	4	26.5
19	41	M	1320.77	389.83	2.53	0.42	7	14.2
20	14	M	1413.92	167.61	1.37	0.28	10.33	14.1
21	35	M	2210.57	52.35	0.69	0.08	6.73	22
22	47	M	1106.68	83.45	0.4	0.07	4.46	15.3
23	32	M	583.77	85.47	0.82	0.31	4.1	22.2
24	24	M	1095.43	26.09	0.46	0.54	7.4	13.6
25	27	M	545.28	222.21	0.41	0.89	7.5	20.4
26	27	M	430.72	0	0.2	0.23	4.48	13.6
27	40	F	1539.8	495.31	0.43	0	4	30.9
28	28	M	1448.17	41.7	0.83	0.33	7.06	15.3
29	19	M	831.26	205.54	1.36	0.51	4	39.4
30	65	M	1296.46	92.23	0.07	0.11	2.94	28
31	42	M	1164.58	332.09	2.94	0.84	8.4	12.6
32	39	M	1383.94	0	1.29	0	4.1	29.5
MCD relapse （steroid-resistant）
33	16	M	142.68	597.94	1	0.49	6.08	15.6
34	33	F	133.22	1340.5	0.25	0	4.54	13.1
35	61	M	132.82	328.36	0.22	0.31	3.89	24.2
36	39	F	107.5	1731.68	0.43	0.33	5.23	30.4
37	48	F	253.35	114.95	0.49	0.86	6.84	15.9
38	25	F	152.45	57.86	0.25	1.09	4.67	26.8
39	41	M	367.29	171.07	2.43	0.26	7.38	35.5
40	42	F	173.67	876.92	0.27	2.72	2	21.6
41	15	F	101.15	409.62	0.28	0.51	6.4	27.4
42	24	M	97.44	0	0.3	0	6.35	29.8
43	15	M	173.67	52.82	0.17	0.09	6.1	39.8
44	15	F	452.96	53.1	0.73	0.16	6.3	14.3
45	27	M	113.72	115.45	0.64	0.29	2	18.1
46	68	F	324.68	75.08	0.38	0.26	3.79	15.3
47	38	M	106.55	628.36	1.2	0.28	3.13	17.7
48	17	F	197.01	184.47	0.27	1.19	3.22	16.8
49	17	F	656.2	192.76	0.86	0.01	6.51	21.6
50	17	F	80.27	605.23	0.08	0.62	4.66	21.4
51	66	F	412.55	252.54	0.25	0.23	1.93	32
52	19	F	223.67	118.92	0.18	0.12	4.07	10
53	61	F	128.17	697.64	0.44	0.04	3.81	14.1
54	15	M	53.54	569.99	0.27	0	8.38	12.1
55	42	F	102.3	1354.8	1.33	0.57	2.7	29.1
MCD remission
1	37	F	0	732.24	0.18	0	1.07	17.3
2	14	F	366.59	675.79	0.32	0.15	1.3	17.5
3	19	F	0	330.78	0.16	0.15	2.02	20.1
4	23	M	465.86	302.68	1.07	0	0.15	30
5	17	F	122.61	1471.91	0.21	0.23	0.08	17.9
6	15	F	0	729.87	0.33	0	0.05	41
7	15	F	0	1111.07	0.32	0	0.18	18.9
8	14	M	0	1096.75	1.12	1.17	0.35	32.9
9	20	F	110.62	900.44	0.33	0.26	0.07	24.4
10	39	F	121.78	395.8	0.27	0	0.87	28.4
11	25	F	426.43	441.74	0.91	0.34	0.07	26.6
12	14	F	360.48	134.75	1.02	0.06	0.08	35.8
13	44	F	140.63	494.83	0.32	0.14	0.26	22.1
14	24	M	82.61	2765.61	0.31	0	0.03	26.2
15	35	M	238.49	478.27	1.7	0.31	0.1	31.3
16	15	M	112.8	171.88	0.35	0	0.17	33.9
17	17	M	459.02	427.23	0.62	0.33	0.08	25.4
18	18	M	0	1281.82	0.45	0.2	0.09	30.4
19	41	M	164.84	690.79	0.9	0.02	0.12	31.5
20	16	M	148.81	894.73	0.27	1.19	0.15	29.5
21	35	M	141.95	841.63	0.35	0.3	0.22	33.1
22	47	M	129.2	522.11	0.74	0.42	0.08	35.1
23	32	M	252.03	193.48	1.18	0.2	0.1	27.3
24	24	M	33.06	792.3	0.62	0.42	0.1	15.7
25	27	M	153.9	982.67	0.56	0.21	0.15	27.5
26	31	F	123.88	490.25	0.2	1.28	0.08	27.5
27	40	F	279.52	906.18	1.71	0.27	0.24	30.9
28	28	M	244.49	399.22	0.18	0.64	1.5	18.9
29	19	M	186.82	333.67	0.86	0.5	0.29	39.6
29	65	M	51.51	822.55	1.01	0.39	0.12	35.9
31	42	M	0	1250.16	0.33	0.19	0.54	25.3
32	39	M	94.97	256.15	1.22	1.13	0.15	32.8
MN
56	39	F	213.57	354.88			1.5	29.2
57	39	F	348.44	1163.67	0.28	0.21	5.46	25.5
58	26	M	381.08	117.99	0.29	0.29	5.14	30.1
59	27	M	377.84	432.04	4.36	0.54	4.69	31.8
60	26	F	555.33	183.58	1.07	0.45	8.13	23.4
61	18	F	591.88	349.42	0.33	0.37	4	20.9
62	24	F	268.45	391.58	0.88	0.68	5.32	21.6
63	48	M	290.79	304.52	0.76	0.37	3.23	38.1
64	42	F	343.69	134.06			2.75	26
65	25	F	0	356.27	0.33	0.29	2.12	25.1
66	66	M	351.78				3.78	29.6
67	36	F	19.74	290.51			2.87	35.5
68	62	F	289.92	291.71			5.67	21.1
69	49	M	432.04	179.11			2.94	30.1
70	24	M	409.27	339.57			6.81	14.1
71	22	F	73.31	286.34	1.05	0.39	4	20.1
72	22	F	279.79	255.45	0.53	0.2	1.68	34
73	45	F	53.59				2.78	24.2
74	27	F	7.97	399.61	0.88	0.06	2	37.8
75	59	M	585.39	30.52	1.21	0	4.72	19
76	55	F	157.85	429.06	0.44	0.35	8.36	26.8
77	50	M	240.21	369.74	1.47	0.7	2.83	25.1
78	63	F	273.18		0.6		7.34	17.5
79	44	M	385.07	165.77	0.88	0.35	5.18	21.7
80	26	M	198.44	50.34	0.92	0	6.4	20.8
81	44	F	540.09	13.36	0.9	0.02	5.9	24.7
